# Supplementary material for: Revealing the lithium migration paths in Li4+xTi5O12 by neutron diffraction
Source: Royal Society of Chemistry journal article supplement (doi:10.1039/d4ta04875j), 2024-01-01
Supplement: d4ta04875j1.pdf [file d4ta04875j1.pdf]

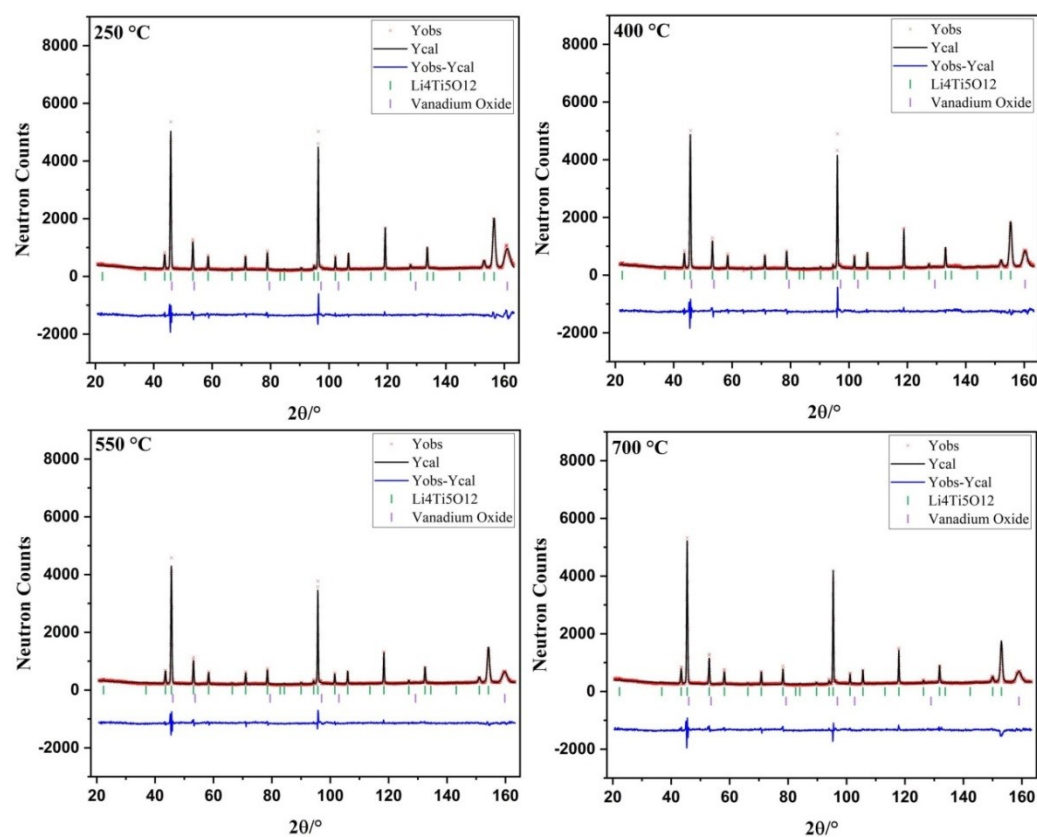

Figure S1. Rietveld refinement plots of  $\text{Li}_4\text{Ti}_5\text{O}_{12}$  at high temperature.

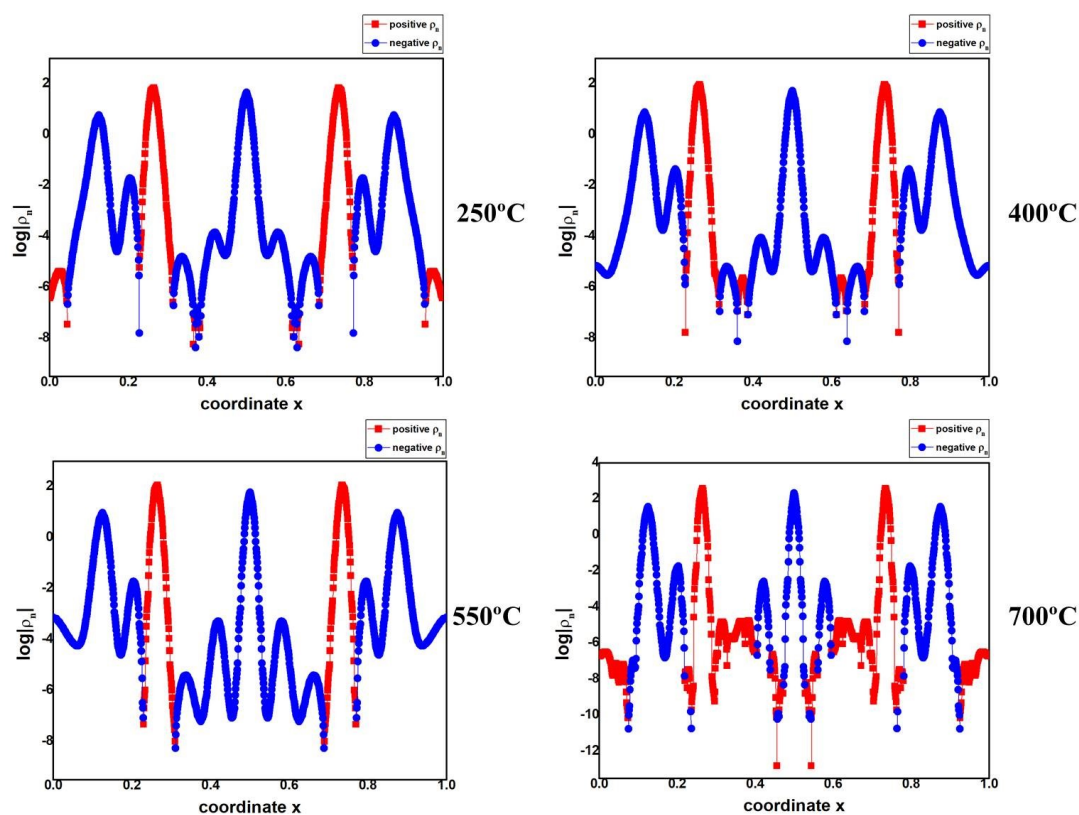

Figure S2. Nuclear density distribution of  $\text{Li}_4\text{Ti}_5\text{O}_{12}$  from fractional Cartesian coordinate (0,0,0) to (1,1,1) at 250 °C, 400 °C, 550 °C, 700 °C.

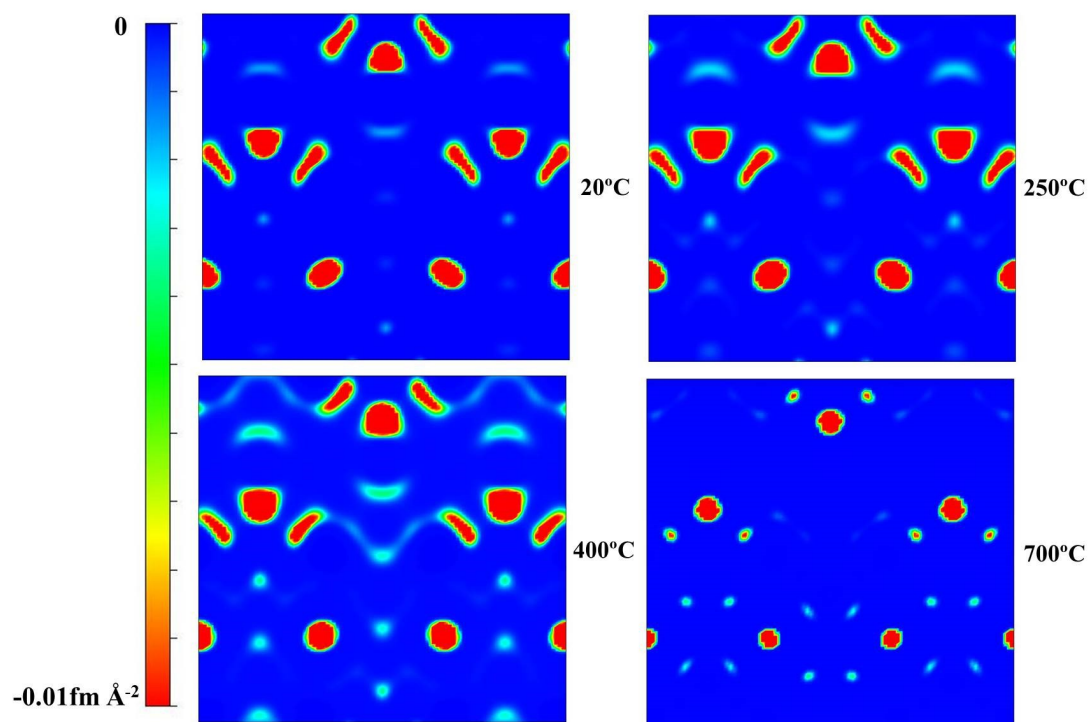

Figure S3. Two-dimensional scattering density map at (101) face of  $\text{Li}_4\text{Ti}_5\text{O}_{12}$  at 20 °C, 250 °C, 400 °C, 700 °C.
